# Supplementary material for: Spontaneous cocrystal hydrate formation in the solid state: crystal structure aspects and kinetics
Source: Royal Society of Chemistry journal article supplement (doi:10.1039/c3nj00489a), 2013-01-01
Supplement: c3nj00489a.pdf [file c3nj00489a.pdf]

Supplementary Information

## Spontaneous cocrystal hydrate formation in the solid state: crystal structure aspects and kinetics

Inese Sarcevica,<sup>a,b</sup> Liana Orola,<sup>a</sup> Sergey Belyakov<sup>b</sup> and Mikelis V. Veidis<sup>a</sup>

**Table S1** Selected hydrogen bonds in 4-aminosalicylic acid–nicotinamide cocrystal

|               | Symmetry code          | D–H (°) | H···A (°) | D···A (°) | ∠D–H···A (°) |
|---------------|------------------------|---------|-----------|-----------|--------------|
| O10–H10···N1  | $x, y, z$              | 0.96(2) | 1.69(2)   | 2.644(1)  | 171(2)       |
| N9–H9A···O8   | $-2 -x, -y, -z$        | 0.90(2) | 2.11(2)   | 2.996(2)  | 169.2(2)     |
| N20–H20A···O8 | $2 +x, 0.5 -y, 0.5 +z$ | 0.92(2) | 2.18(2)   | 2.77(2)   | 145.2(2)     |

**Table S2** Results of conventional solid state kinetic model fitting to hydration of anhydrous 4-aminosalicylic acid–nicotinamide cocrystal

| Model | RH (%)         |       |       |       |
|-------|----------------|-------|-------|-------|
|       | 40             | 50    | 70    | 80    |
|       | R <sup>2</sup> |       |       |       |
| P2    | 0.833          | 0.722 | 0.732 | 0.517 |
| P3    | 0.901          | 0.798 | 0.773 | 0.614 |
| P4    | 0.777          | 0.667 | 0.704 | 0.451 |
| A2    | 0.892          | 0.830 | 0.848 | 0.762 |
| A3    | 0.955          | 0.910 | 0.844 | 0.880 |
| A4    | 0.845          | 0.776 | 0.815 | 0.679 |
| R2    | 0.931          | 0.858 | 0.842 | 0.755 |
| R3    | 0.940          | 0.877 | 0.863 | 0.801 |
| D1    | 0.971          | 0.903 | 0.843 | 0.755 |
| D2    | 0.982          | 0.936 | 0.890 | 0.839 |
| D3    | 0.916          | 0.822 | 0.791 | 0.649 |
| D4    | 0.985          | 0.948 | 0.908 | 0.874 |
| F1    | 0.955          | 0.910 | 0.902 | 0.880 |
| F2    | 0.988          | 0.979 | 0.978 | 0.995 |
| F3    | 0.994          | 0.999 | 0.999 | 0.968 |

**Table S3** Results of conventional solid state kinetic model fitting for the formation of 4-aminosalicylic acid–nicotinamide cocrystal monohydrate from starting components

| Model | RH, %          |       |       |
|-------|----------------|-------|-------|
|       | 70             | 80    | 90    |
|       | R <sup>2</sup> |       |       |
| P2    | 0.837          | 0.809 | 0.566 |
| P3    | 0.933          | 0.891 | 0.629 |
| P4    | 0.747          | 0.743 | 0.524 |
| A2    | 0.848          | 0.833 | 0.638 |
| A3    | 0.941          | 0.914 | 0.717 |
| A4    | 0.777          | 0.779 | 0.595 |
| R2    | 0.937          | 0.903 | 0.674 |
| R3    | 0.939          | 0.906 | 0.689 |
| D1    | 0.991          | 0.976 | 0.742 |
| D2    | 0.992          | 0.981 | 0.775 |
| D3    | 0.937          | 0.900 | 0.650 |
| D4    | 0.992          | 0.982 | 0.788 |
| F1    | 0.941          | 0.914 | 0.717 |
| F2    | 0.950          | 0.934 | 0.795 |
| F3    | 0.957          | 0.952 | 0.860 |

**Table S4** Rietveld analysis of kinetic data for the hydration of anhydrous 4-aminosalicylic acid–nicotinamide cocrystal at 40% RH, 30 °C

| Time, min | W <sub>hydrate</sub> , % | W <sub>cocrystal</sub> , % | Rwp   |
|-----------|--------------------------|----------------------------|-------|
| 3.0       | 7.0                      | 93.0                       | 7.80  |
| 9.0       | 11.8                     | 88.2                       | 7.13  |
| 14.0      | 16.3                     | 83.3                       | 6.27  |
| 24.0      | 21.9                     | 78.1                       | 5.80  |
| 30.0      | 28.9                     | 71.1                       | 5.65  |
| 37.0      | 33.7                     | 66.3                       | 5.58  |
| 43.0      | 37.0                     | 63.0                       | 6.09  |
| 58.0      | 42.5                     | 57.5                       | 6.12  |
| 63.0      | 46.9                     | 53.1                       | 6.41  |
| 71.0      | 49.1                     | 50.9                       | 6.65  |
| 77.0      | 51.1                     | 49.0                       | 7.00  |
| 80.0      | 51.4                     | 48.6                       | 7.75  |
| 86.0      | 53.1                     | 46.9                       | 6.81  |
| 89.0      | 53.5                     | 46.5                       | 7.81  |
| 97.0      | 55.6                     | 44.4                       | 6.88  |
| 103.0     | 56.7                     | 43.3                       | 7.07  |
| 111.0     | 56.7                     | 43.3                       | 10.30 |
| 119.0     | 59.3                     | 40.7                       | 9.59  |
| 126.0     | 60.3                     | 39.7                       | 7.51  |
| 138.0     | 61.9                     | 38.1                       | 7.51  |
| 146.0     | 62.1                     | 37.9                       | 7.60  |

**Table S5** Rietveld analysis of kinetic data for the hydration of anhydrous 4-aminosalicylic acid–nicotinamide cocrystal at 50% RH, 30 °C

---

| Time, min | W <sub>hydrate</sub> , % | W <sub>cocrystal</sub> , % | Rwp   |
|-----------|--------------------------|----------------------------|-------|
| 2.7       | 15.0                     | 85.0                       | 7.79  |
| 8.0       | 25.7                     | 74.3                       | 8.53  |
| 13.2      | 34.3                     | 65.7                       | 9.12  |
| 18.5      | 41.2                     | 58.8                       | 9.95  |
| 23.7      | 46.4                     | 53.7                       | 10.09 |
| 28.9      | 50.8                     | 49.3                       | 10.98 |
| 34.2      | 53.8                     | 46.2                       | 11.03 |
| 39.4      | 56.7                     | 43.4                       | 11.45 |
| 44.7      | 59.2                     | 40.8                       | 11.63 |
| 49.9      | 61.0                     | 39.1                       | 11.67 |
| 55.2      | 62.7                     | 37.3                       | 11.75 |
| 60.4      | 64.4                     | 35.6                       | 12.22 |
| 65.7      | 65.6                     | 34.4                       | 12.28 |
| 70.9      | 66.6                     | 33.4                       | 11.95 |
| 76.1      | 67.9                     | 32.1                       | 12.23 |
| 81.4      | 68.9                     | 31.1                       | 12.53 |
| 86.6      | 69.5                     | 30.5                       | 12.53 |
| 91.9      | 70.5                     | 29.5                       | 12.53 |
| 97.1      | 71.4                     | 28.7                       | 12.74 |
| 107.6     | 72.2                     | 27.8                       | 12.82 |
| 118.1     | 73.7                     | 26.3                       | 12.87 |
| 128.5     | 74.9                     | 25.1                       | 12.88 |

**Table S6** Rietveld analysis of kinetic data for the hydration of anhydrous 4-aminosalicylic acid–nicotinamide cocrystal at 70% RH, 30 °C

| Time, min | W <sub>hydrate</sub> , % | W <sub>cocrystal</sub> , % | Rwp   |
|-----------|--------------------------|----------------------------|-------|
| 2.6       | 39.7                     | 60.3                       | 9.59  |
| 5.1       | 52.3                     | 47.7                       | 10.70 |
| 7.6       | 59.3                     | 40.7                       | 11.67 |
| 10.1      | 64.1                     | 35.9                       | 11.95 |
| 12.6      | 67.9                     | 32.1                       | 12.37 |
| 15.1      | 70.9                     | 29.1                       | 12.33 |
| 17.6      | 73.2                     | 26.8                       | 12.85 |
| 20.1      | 74.5                     | 25.5                       | 13.06 |
| 22.6      | 75.9                     | 24.1                       | 12.91 |
| 25.0      | 77.0                     | 23.0                       | 13.12 |
| 30.0      | 79.4                     | 20.6                       | 13.31 |
| 32.5      | 80.0                     | 20.0                       | 13.49 |
| 35.0      | 80.8                     | 19.2                       | 13.35 |
| 40.0      | 81.8                     | 18.2                       | 13.67 |
| 42.5      | 82.4                     | 17.7                       | 13.65 |
| 45.0      | 82.9                     | 17.1                       | 13.47 |

**Table S7** Rietveld analysis of kinetic data for the hydration of anhydrous 4-aminosalicylic acid–nicotinamide cocrystal at 80% RH, 30 °C

| Time, min | W <sub>hydrate</sub> , % | W <sub>cocrystal</sub> , % | Rwp   |
|-----------|--------------------------|----------------------------|-------|
| 1.4       | 11.7                     | 88.3                       | 10.12 |
| 4.0       | 38.5                     | 61.5                       | 10.01 |
| 6.7       | 55.6                     | 44.4                       | 11.53 |
| 9.3       | 65.7                     | 34.3                       | 12.50 |
| 12.0      | 71.5                     | 28.5                       | 13.02 |
| 14.6      | 76.5                     | 23.5                       | 13.26 |
| 17.3      | 78.7                     | 21.3                       | 13.54 |
| 20.0      | 81.2                     | 18.9                       | 13.61 |
| 22.6      | 82.5                     | 17.5                       | 13.63 |
| 25.3      | 84.9                     | 15.1                       | 13.83 |
| 28.0      | 85.4                     | 14.6                       | 13.95 |
| 30.6      | 86.2                     | 13.8                       | 13.83 |
| 33.3      | 88.0                     | 12.0                       | 14.01 |
| 36.0      | 88.3                     | 11.7                       | 14.18 |
| 38.6      | 89.0                     | 11.1                       | 14.26 |
| 41.3      | 89.7                     | 10.3                       | 14.11 |
| 44.0      | 89.7                     | 10.3                       | 14.26 |
| 46.6      | 90.3                     | 9.7                        | 14.17 |
| 49.3      | 90.8                     | 9.2                        | 14.09 |
| 52.0      | 91.1                     | 8.9                        | 14.41 |
| 54.6      | 91.6                     | 8.4                        | 14.41 |
| 57.3      | 92.0                     | 8.0                        | 14.21 |

**Table S8** Rietveld analysis of kinetic data for the formation of 4-aminosalicylic acid–nicotinamide cocrystal hydrate from starting components at 70% RH, 30 °C

| Time, min | W <sub>hydrate</sub> , % | W <sub>4-ASA</sub> , % | W <sub>nicotinamide</sub> , % | Rwp   |
|-----------|--------------------------|------------------------|-------------------------------|-------|
| 1.3       | 0.6                      | 51.3                   | 48.1                          | 10.88 |
| 5.0       | 1.0                      | 51.0                   | 48.0                          | 10.57 |
| 7.6       | 1.0                      | 51.2                   | 47.9                          | 10.34 |
| 10.3      | 2.3                      | 51.4                   | 46.4                          | 10.32 |
| 12.9      | 2.8                      | 50.9                   | 46.3                          | 10.36 |
| 15.6      | 3.9                      | 50.3                   | 45.8                          | 9.85  |
| 18.3      | 4.9                      | 49.9                   | 45.2                          | 10.00 |
| 20.9      | 5.3                      | 49.6                   | 45.1                          | 10.06 |
| 23.6      | 6.2                      | 49.1                   | 44.7                          | 10.07 |
| 26.3      | 6.2                      | 49.5                   | 44.3                          | 10.17 |
| 28.9      | 6.9                      | 48.8                   | 44.3                          | 10.03 |
| 31.6      | 7.6                      | 48.5                   | 43.9                          | 9.80  |
| 34.2      | 8.0                      | 48.4                   | 43.7                          | 10.00 |
| 36.9      | 8.1                      | 48.0                   | 43.8                          | 9.96  |
| 39.5      | 8.5                      | 48.3                   | 43.3                          | 10.11 |
| 42.2      | 9.3                      | 48.0                   | 42.7                          | 9.79  |
| 44.9      | 9.1                      | 48.0                   | 43.0                          | 9.94  |
| 47.5      | 9.5                      | 47.6                   | 42.9                          | 9.95  |
| 50.2      | 9.8                      | 47.4                   | 42.7                          | 9.76  |
| 52.8      | 10.3                     | 47.2                   | 42.6                          | 9.84  |
| 55.5      | 10.0                     | 47.7                   | 42.3                          | 9.92  |
| 58.1      | 10.5                     | 47.6                   | 42.0                          | 9.69  |
| 60.8      | 11.1                     | 46.7                   | 42.2                          | 9.94  |
| 63.4      | 10.9                     | 46.8                   | 42.3                          | 9.74  |
| 66.1      | 11.5                     | 46.4                   | 42.1                          | 9.72  |
| 68.8      | 11.6                     | 46.4                   | 42.0                          | 9.74  |
| 71.4      | 11.6                     | 46.5                   | 41.9                          | 9.56  |
| 74.1      | 11.8                     | 46.3                   | 41.9                          | 9.84  |
| 76.7      | 12.3                     | 46.2                   | 41.5                          | 9.87  |
| 79.4      | 12.7                     | 45.9                   | 41.5                          | 9.71  |
| 82.1      | 12.8                     | 45.8                   | 41.4                          | 9.84  |
| 84.7      | 12.4                     | 46.2                   | 41.3                          | 9.79  |
| 87.4      | 13.2                     | 45.4                   | 41.4                          | 9.75  |
| 90.0      | 13.6                     | 45.3                   | 41.1                          | 10.02 |
| 98.0      | 13.4                     | 45.7                   | 40.8                          | 9.77  |

**Table S9** Rietveld analysis of kinetic data for the formation of 4-aminosalicylic acid–nicotinamide cocrystal hydrate from starting components at 80% RH, 30 °C

---

| Time, min | W <sub>hydrate</sub> , % | W <sub>4-ASA</sub> , % | W <sub>nicotinamide</sub> , % | Rwp  |
|-----------|--------------------------|------------------------|-------------------------------|------|
| 1.3       | 4.1                      | 51.2                   | 44.8                          | 8.85 |
| 4.0       | 7.1                      | 49.5                   | 43.4                          | 8.91 |
| 6.7       | 9.1                      | 48.3                   | 42.6                          | 8.81 |
| 9.3       | 10.8                     | 47.2                   | 42.0                          | 8.83 |
| 12.0      | 12.4                     | 47.0                   | 40.6                          | 8.82 |
| 14.7      | 13.5                     | 46.6                   | 39.9                          | 9.07 |
| 17.3      | 14.6                     | 45.8                   | 39.6                          | 8.97 |
| 22.7      | 16.6                     | 44.7                   | 38.6                          | 8.65 |
| 25.3      | 17.4                     | 44.2                   | 38.3                          | 8.96 |
| 30.7      | 18.3                     | 43.5                   | 38.2                          | 8.57 |
| 33.3      | 19.7                     | 43.1                   | 37.2                          | 8.87 |
| 38.7      | 20.2                     | 42.6                   | 37.2                          | 8.84 |
| 44.0      | 21.5                     | 42.2                   | 36.4                          | 8.77 |
| 49.4      | 22.1                     | 41.9                   | 36.1                          | 8.98 |
| 57.4      | 23.7                     | 40.8                   | 35.5                          | 8.83 |
| 65.4      | 25.0                     | 40.2                   | 34.8                          | 8.81 |
| 70.7      | 25.6                     | 39.7                   | 34.8                          | 8.85 |
| 81.4      | 26.7                     | 39.5                   | 33.8                          | 8.77 |
| 94.8      | 27.6                     | 39.3                   | 33.1                          | 8.79 |

**Table S10** Rietveld analysis of kinetic data for the formation of 4-aminosalicylic acid–nicotinamide cocrystal hydrate from starting components at 90% RH, 30 °C

---

| Time, min | W <sub>hydrate</sub> , % | W <sub>4-ASA</sub> , % | W <sub>nicotinamide</sub> , % | Rwp   |
|-----------|--------------------------|------------------------|-------------------------------|-------|
| 1.3       | 23.9                     | 44.5                   | 31.6                          | 10.02 |
| 4.0       | 37.9                     | 35.5                   | 26.6                          | 8.67  |
| 6.6       | 41.1                     | 33.5                   | 25.4                          | 8.94  |
| 9.3       | 43.6                     | 32.1                   | 24.3                          | 9.17  |
| 12.0      | 44.9                     | 31.5                   | 23.6                          | 9.12  |
| 14.6      | 46.5                     | 30.5                   | 23.0                          | 9.06  |
| 17.3      | 47.5                     | 29.7                   | 22.8                          | 8.97  |
| 19.9      | 48.6                     | 29.3                   | 22.2                          | 9.03  |
| 22.6      | 49.4                     | 28.7                   | 21.9                          | 9.06  |
| 27.9      | 50.5                     | 28.1                   | 21.4                          | 9.45  |
| 33.3      | 51.5                     | 27.3                   | 21.2                          | 9.10  |
| 38.6      | 52.9                     | 26.4                   | 20.7                          | 9.40  |
| 43.9      | 53.5                     | 26.2                   | 20.3                          | 8.94  |
| 46.5      | 53.7                     | 26.0                   | 20.3                          | 9.32  |
| 59.8      | 55.0                     | 25.5                   | 19.5                          | 9.33  |
| 73.1      | 56.0                     | 24.8                   | 19.2                          | 9.14  |
| 83.8      | 56.9                     | 24.3                   | 18.8                          | 9.26  |
| 97.1      | 58.0                     | 24.0                   | 18.1                          | 9.35  |

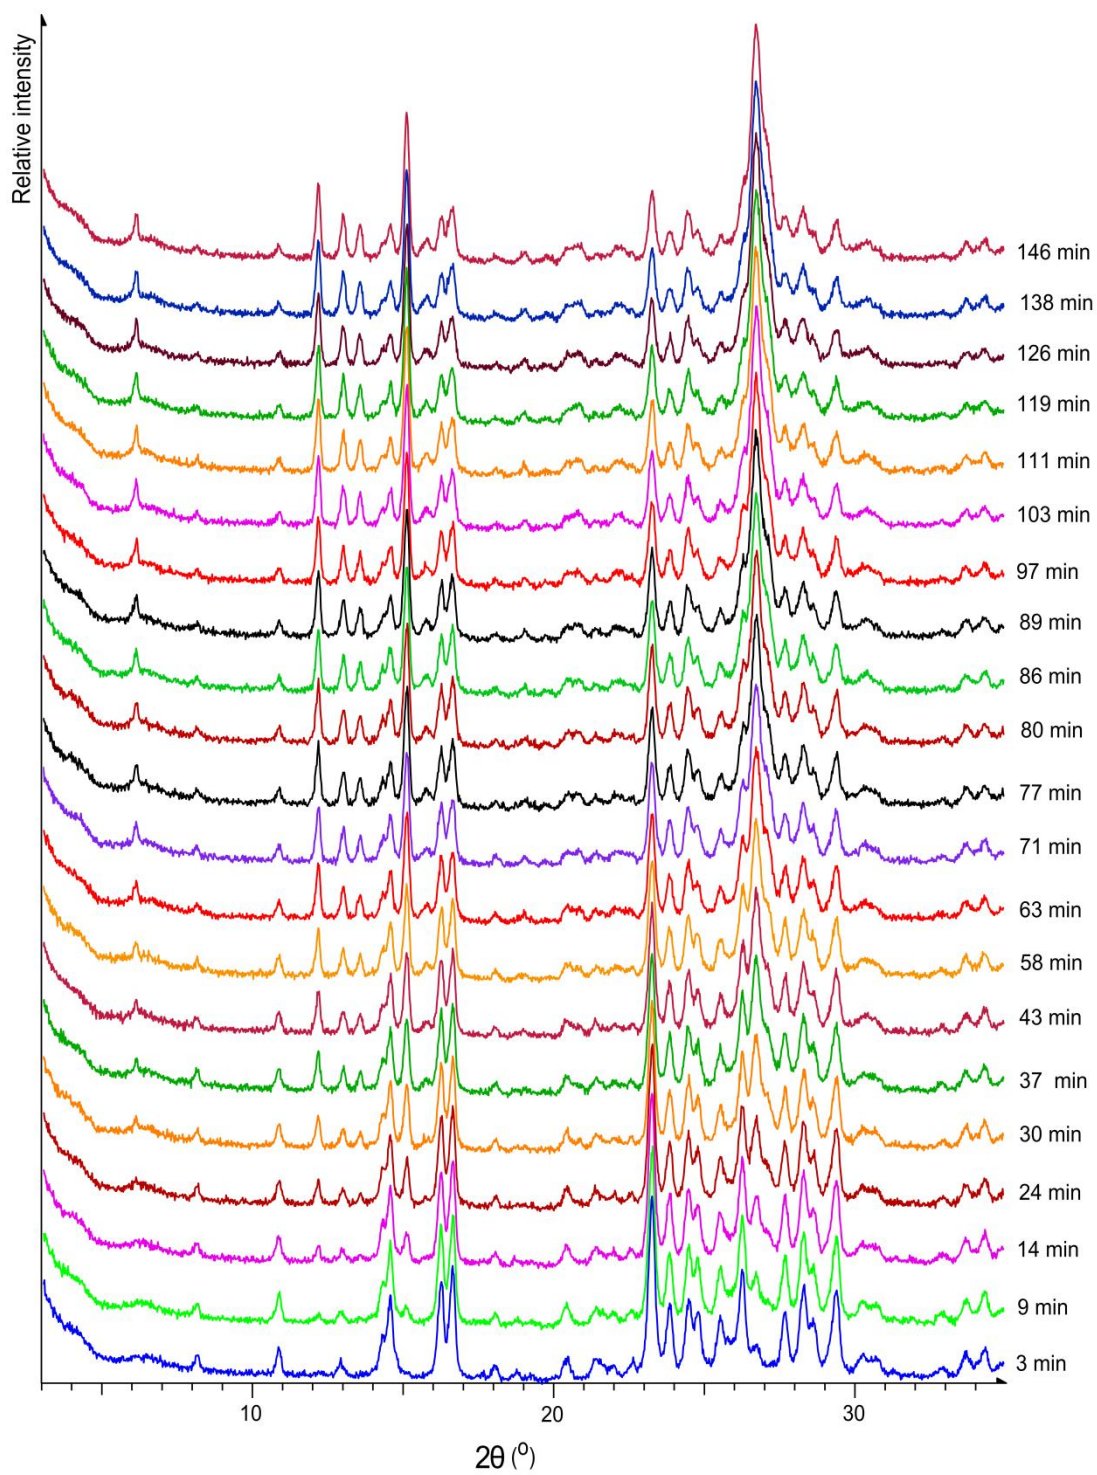

**Fig. S1** Diffraction patterns for the hydration of anhydrous 4-aminosalicylic acid–nicotinamide cocrystal at 40% RH, 30 °C



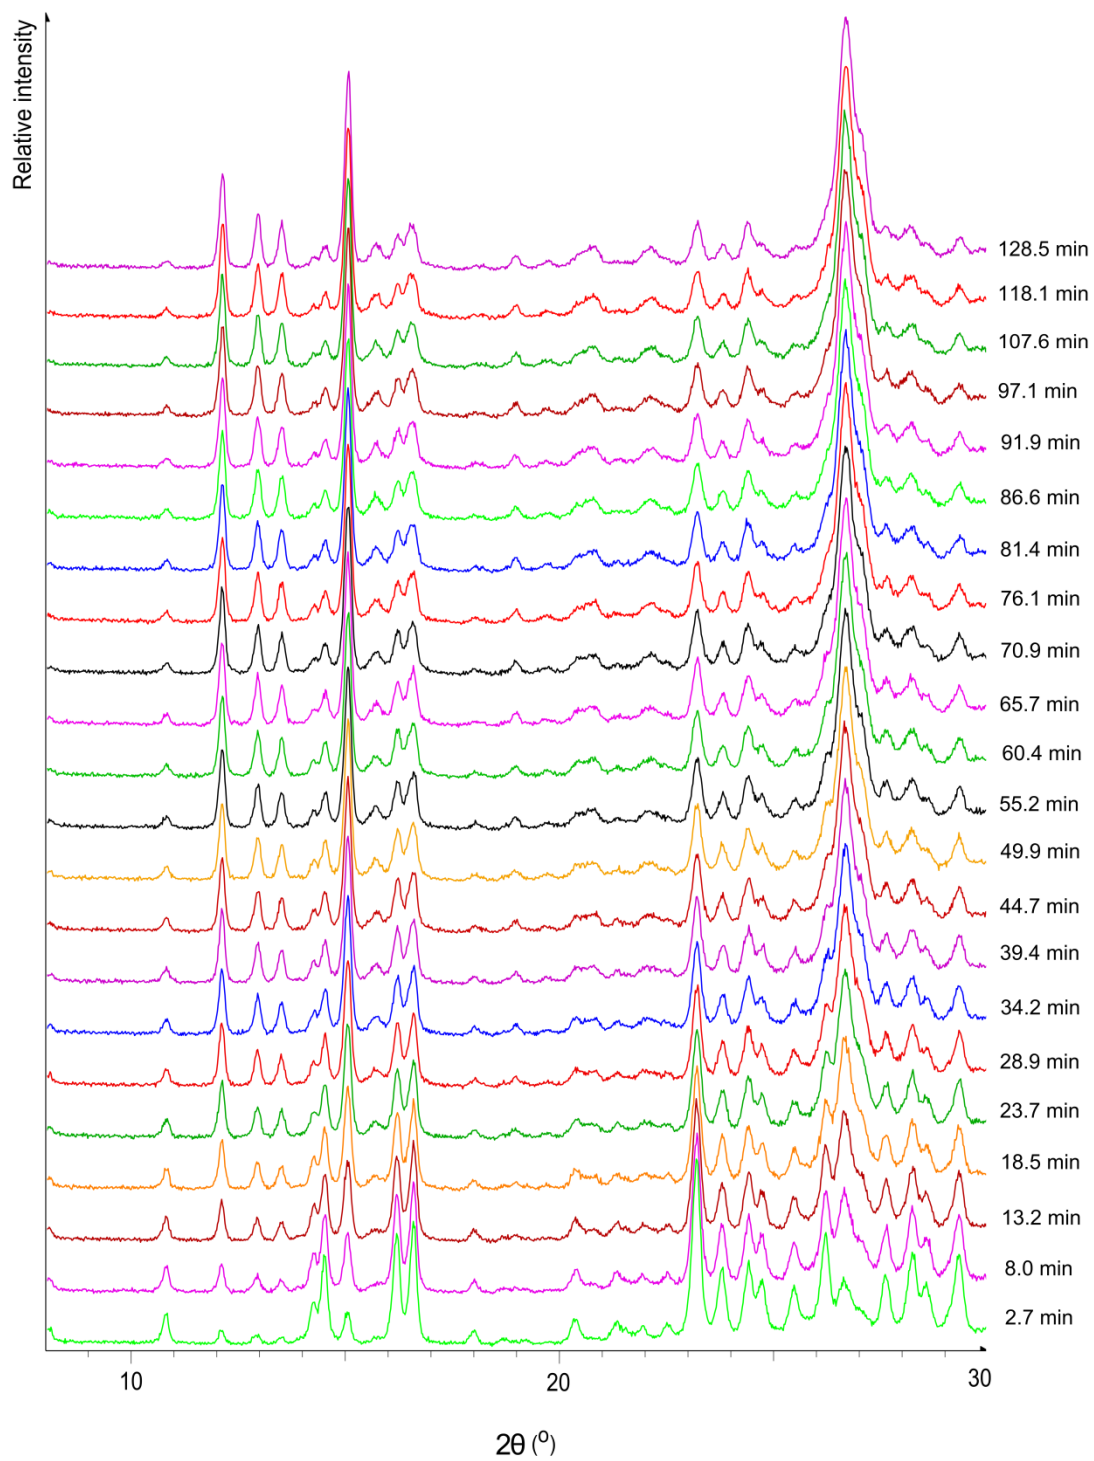

**Fig. S2** Diffraction patterns for the hydration of anhydrous 4-aminosalicylic acid–nicotinamide cocrystal at 50% RH, 30 °C

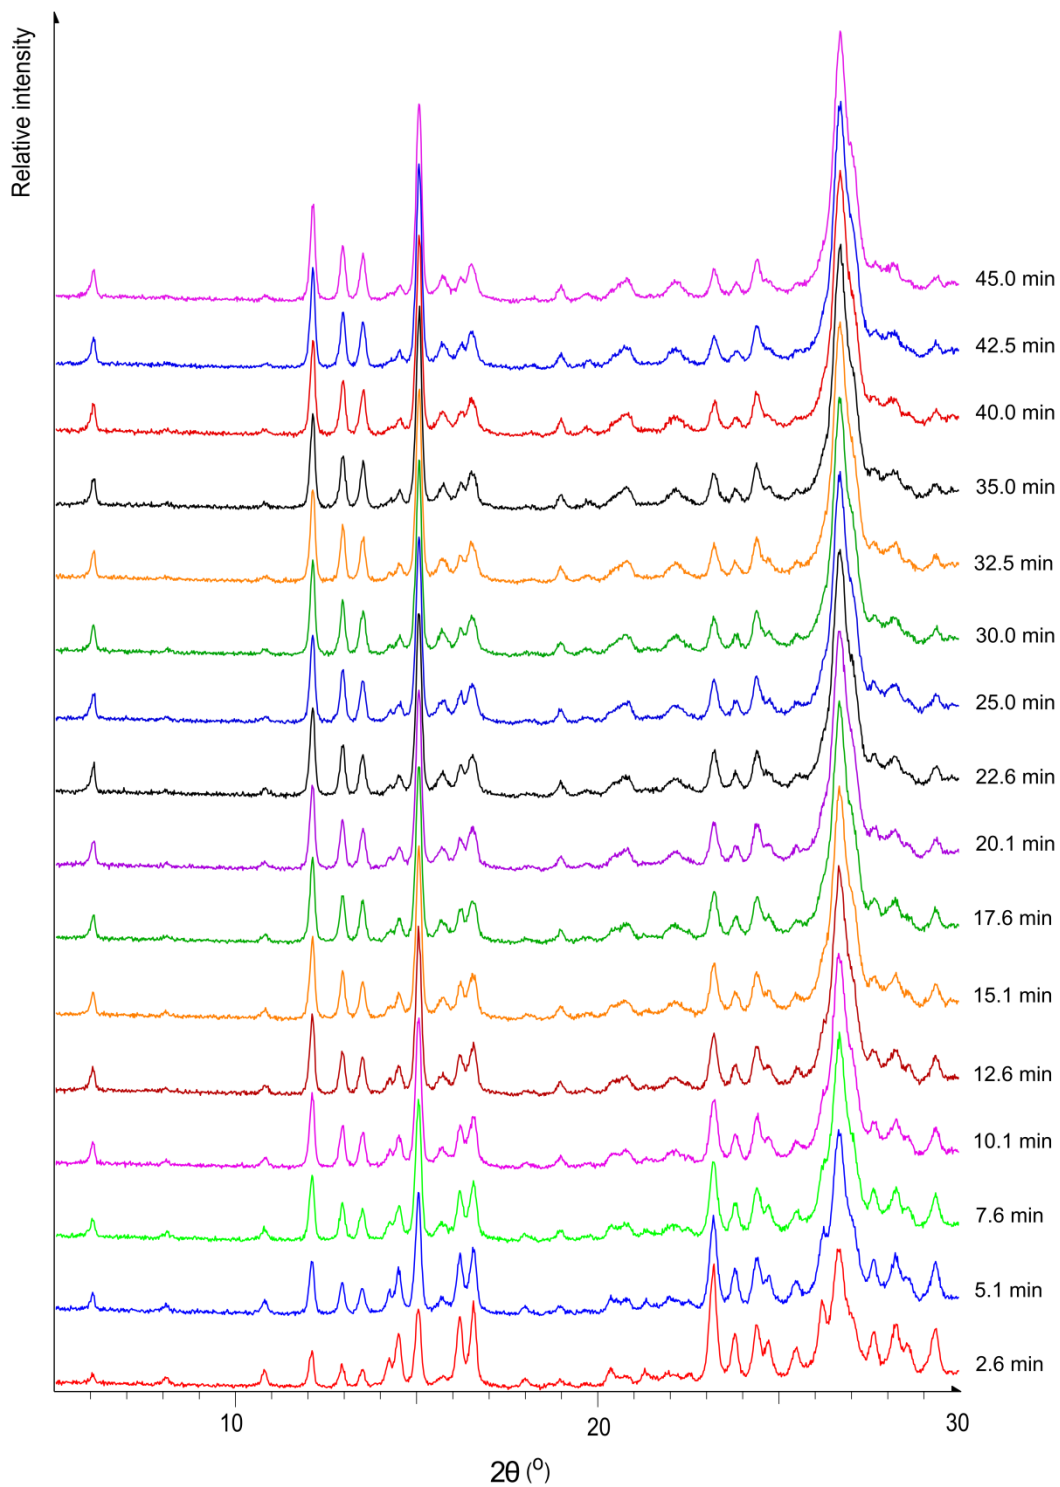

**Fig. S3** Diffraction patterns for the hydration of anhydrous 4-aminosalicylic acid-nicotinamide cocrystal at 70% RH, 30 °C

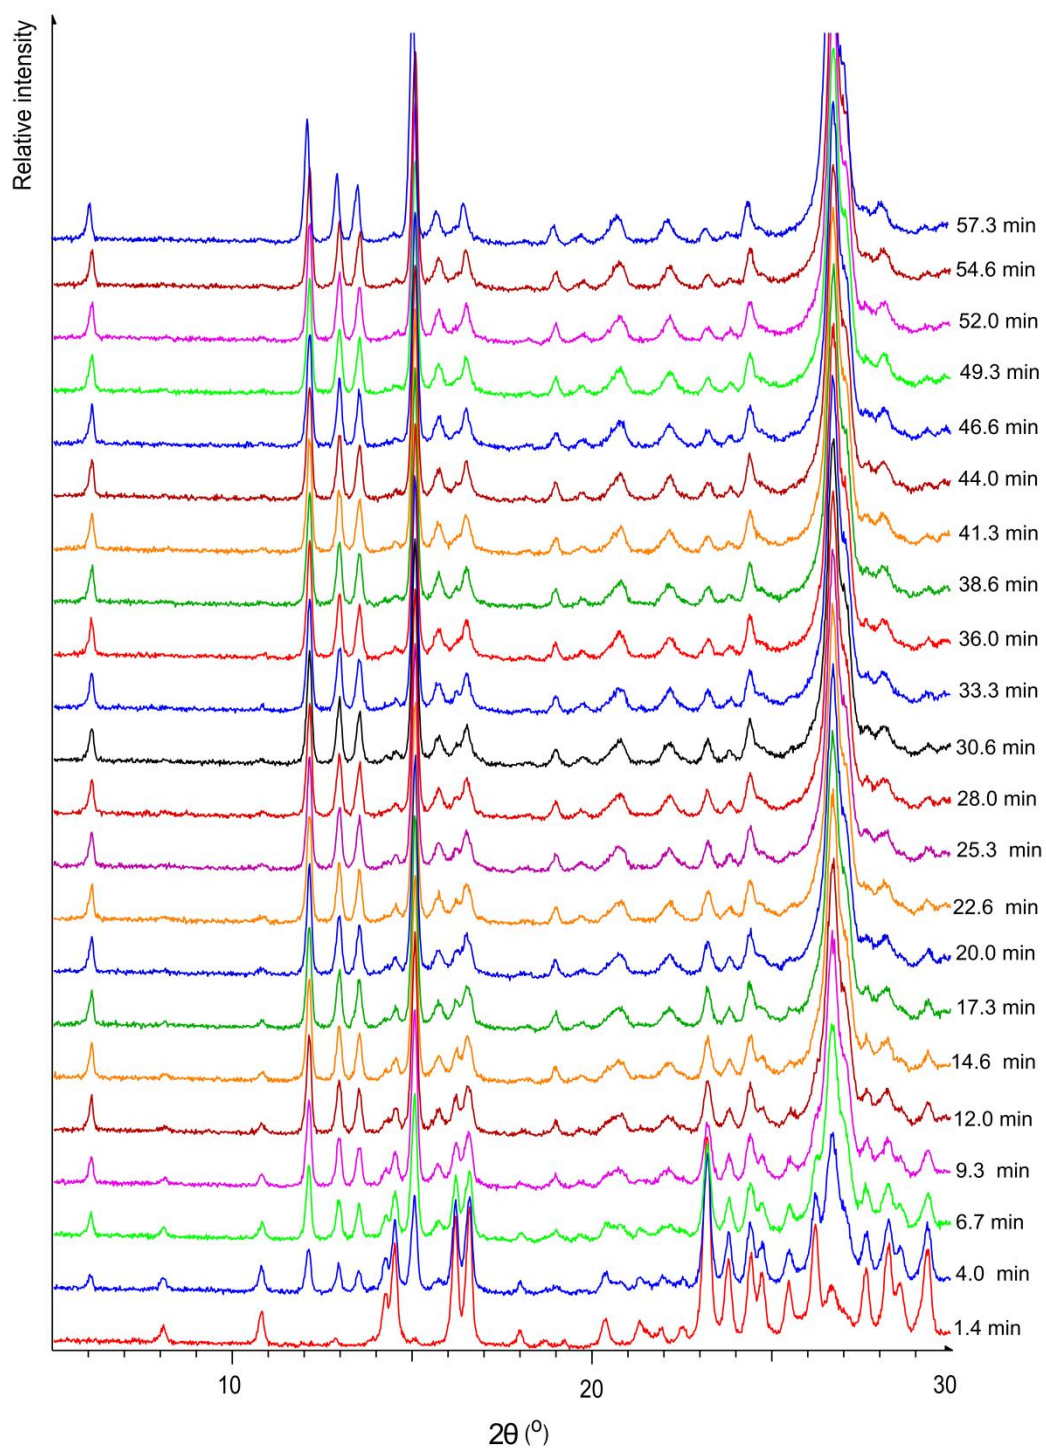

**Fig. S4** Diffraction patterns for the hydration of anhydrous 4-aminosalicylic acid–nicotinamide cocrystal at 80% RH, 30 °C



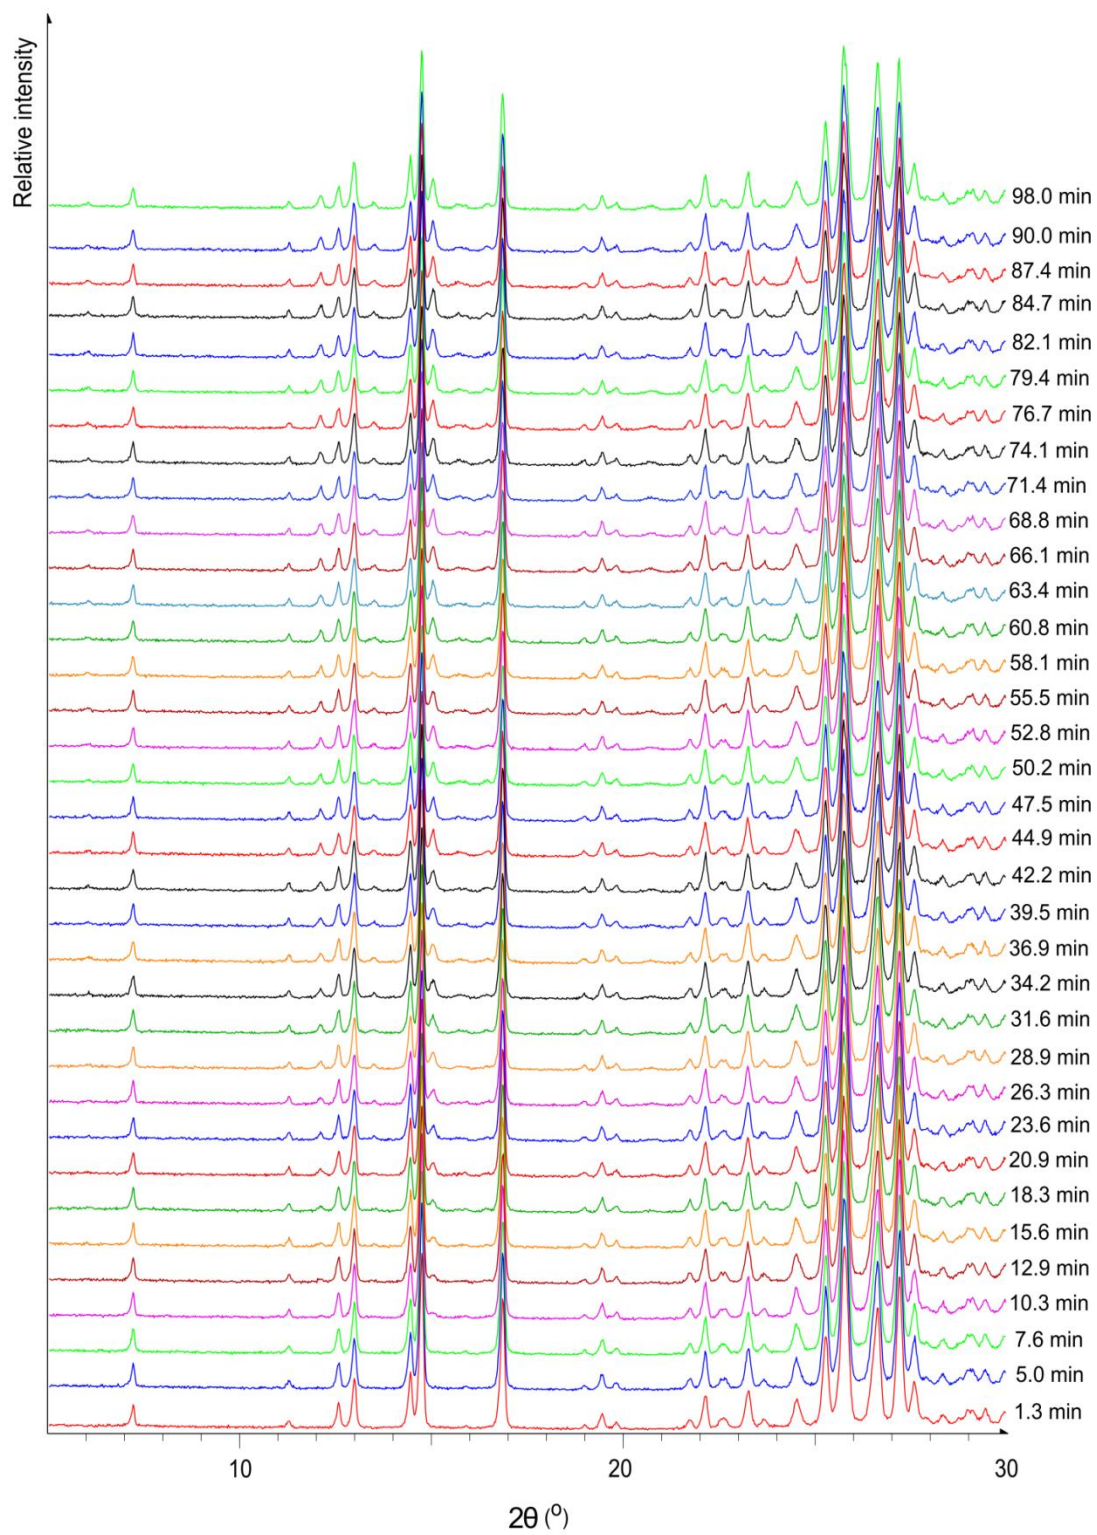

**Fig. S5** Diffraction patterns for the formation of 4-aminosalicylic acid–nicotinamide cocrystal monohydrate at 70% RH, 30 °C from starting compounds

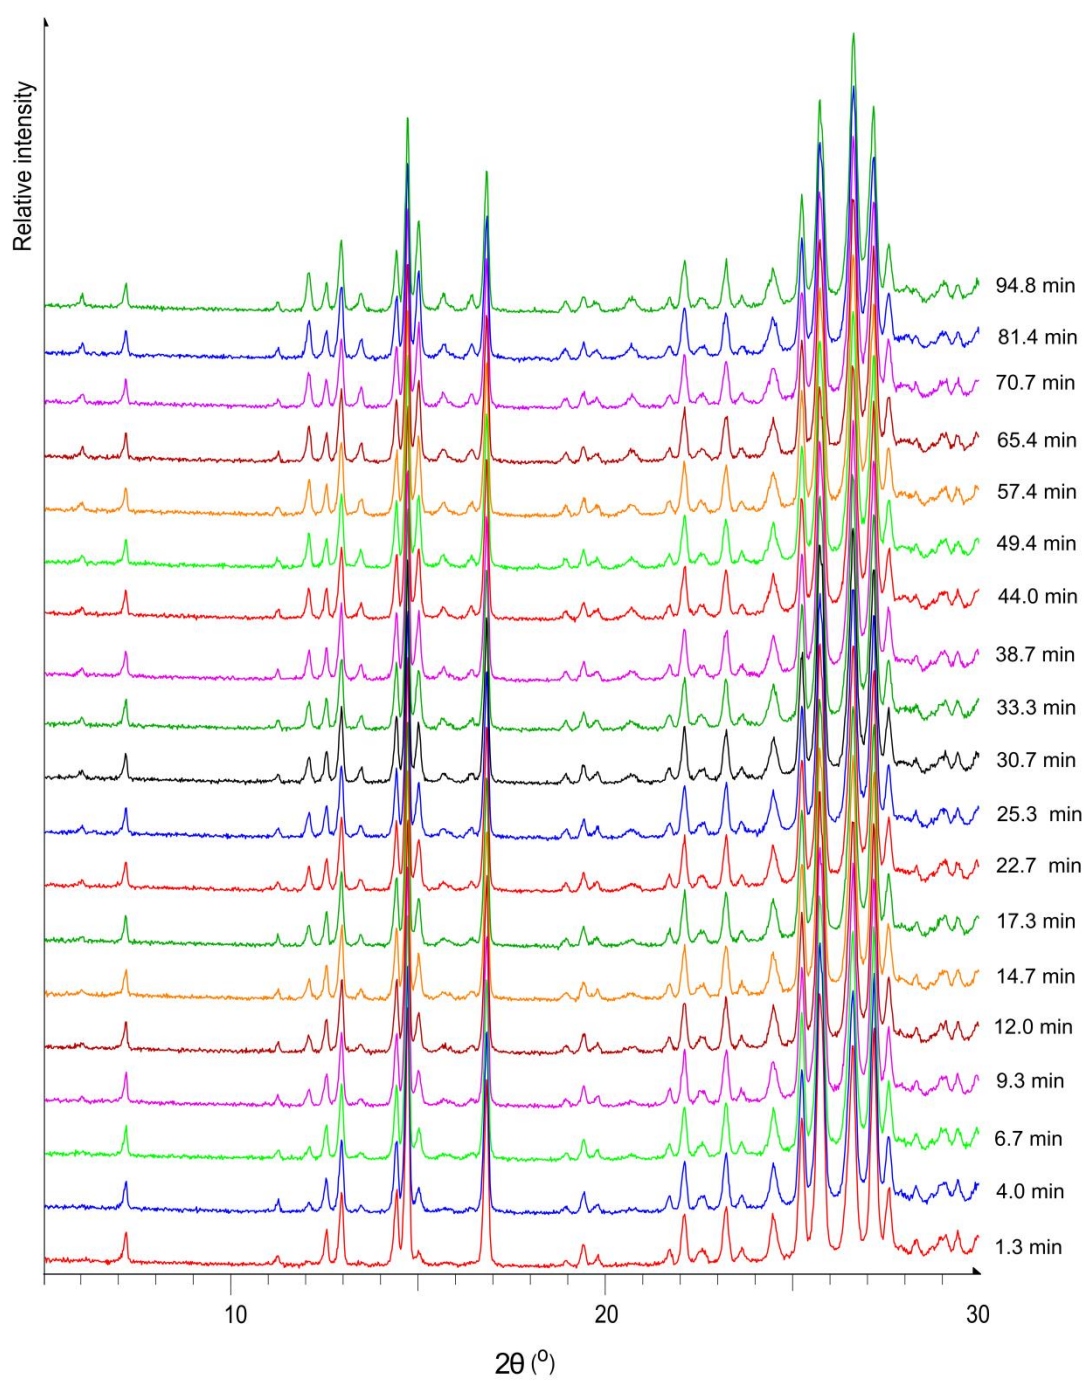

**Fig. S6** Diffraction patterns for the formation of 4-aminosalicylic acid–nicotinamide cocrystal monohydrate at 80% RH, 30 °C from starting compounds



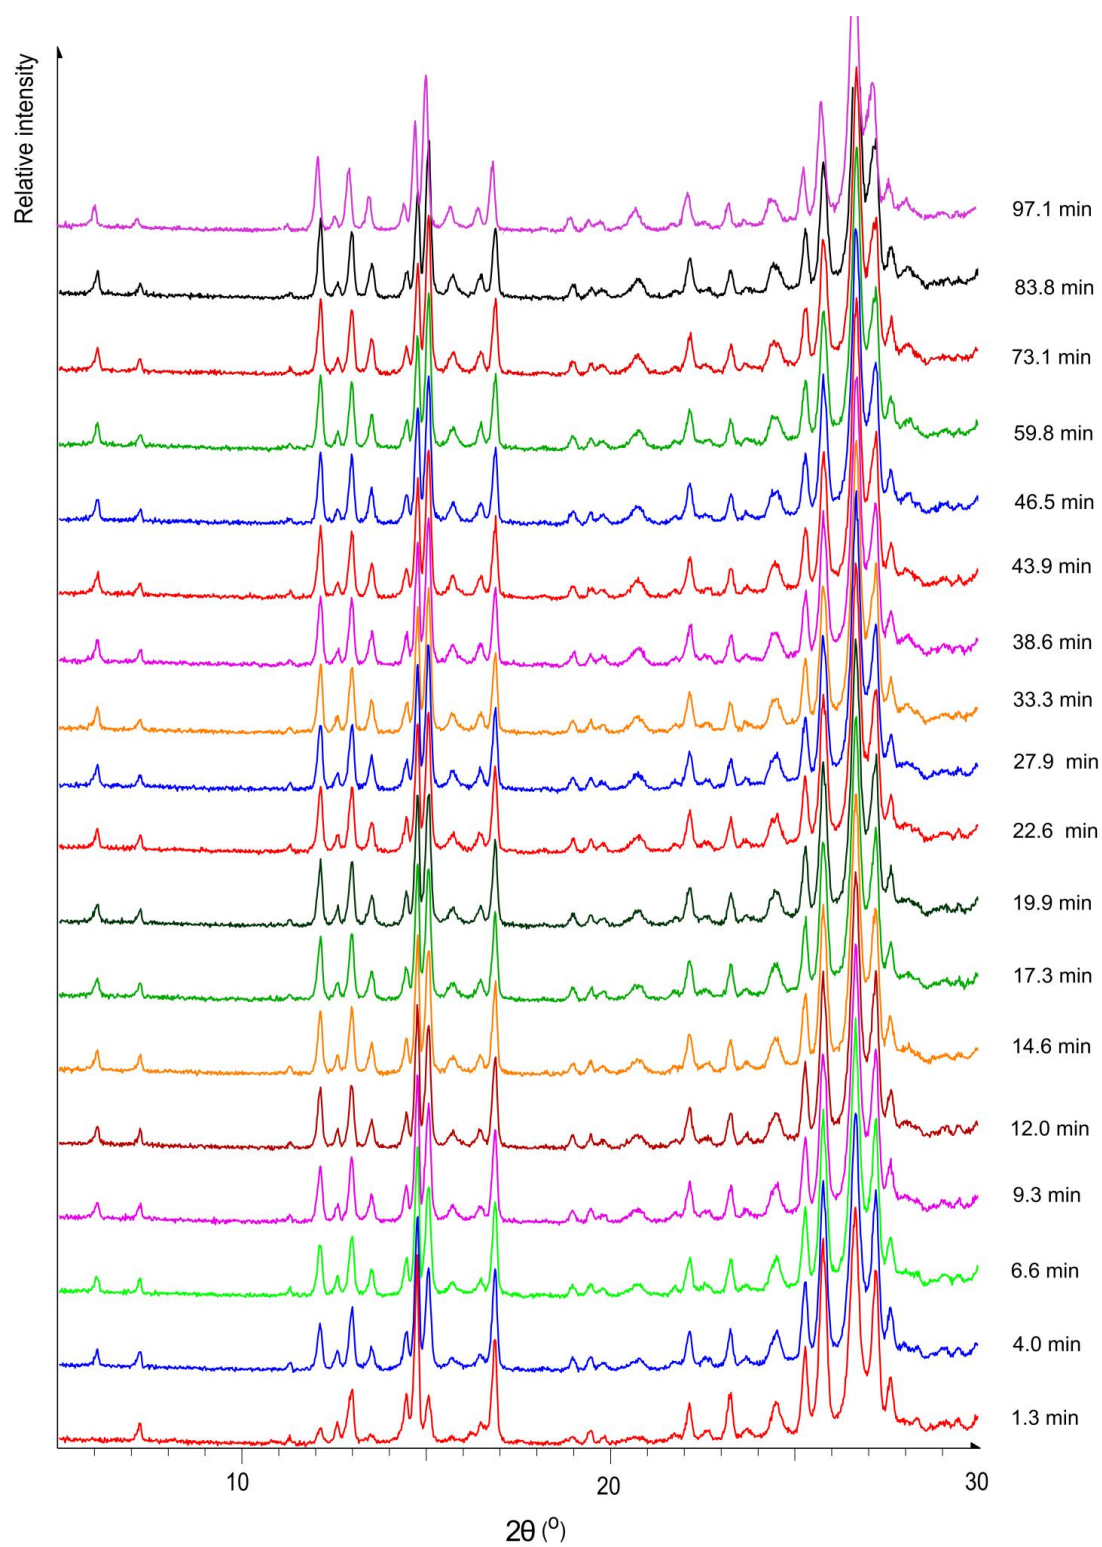

**Fig. S7** Diffraction patterns for the formation of 4-aminosalicylic acid–nicotinamide cocrystal monohydrate at 90% RH, 30 °C from starting compounds
